# Supplementary material for: The Influence of Additives and Environment on Biodegradation of PHBV Biocomposites
Source: MDPI journal article supplement (doi:10.3390/polym14040838), 2022-02-21
Supplement: s1 [file s1]

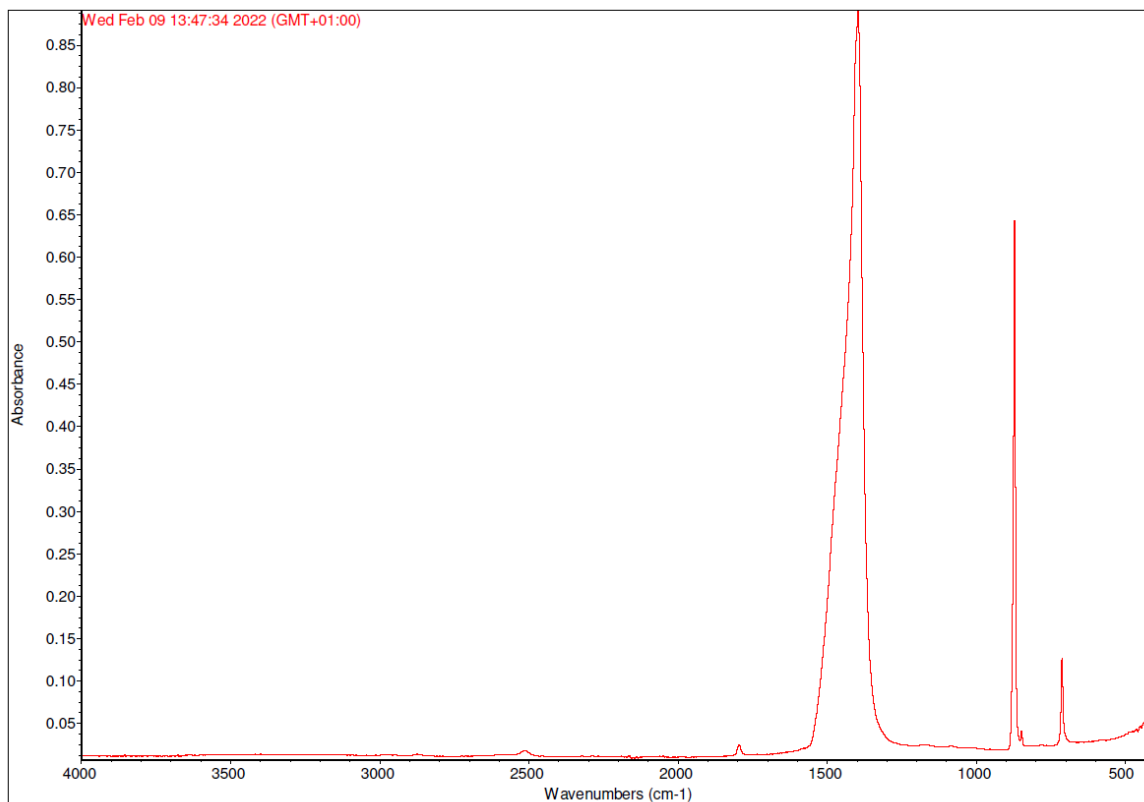

**Figure S1.** FTIR spectra of precipitated CaCO<sub>3</sub> (Honeywell Fluka, Seelze, Germany).

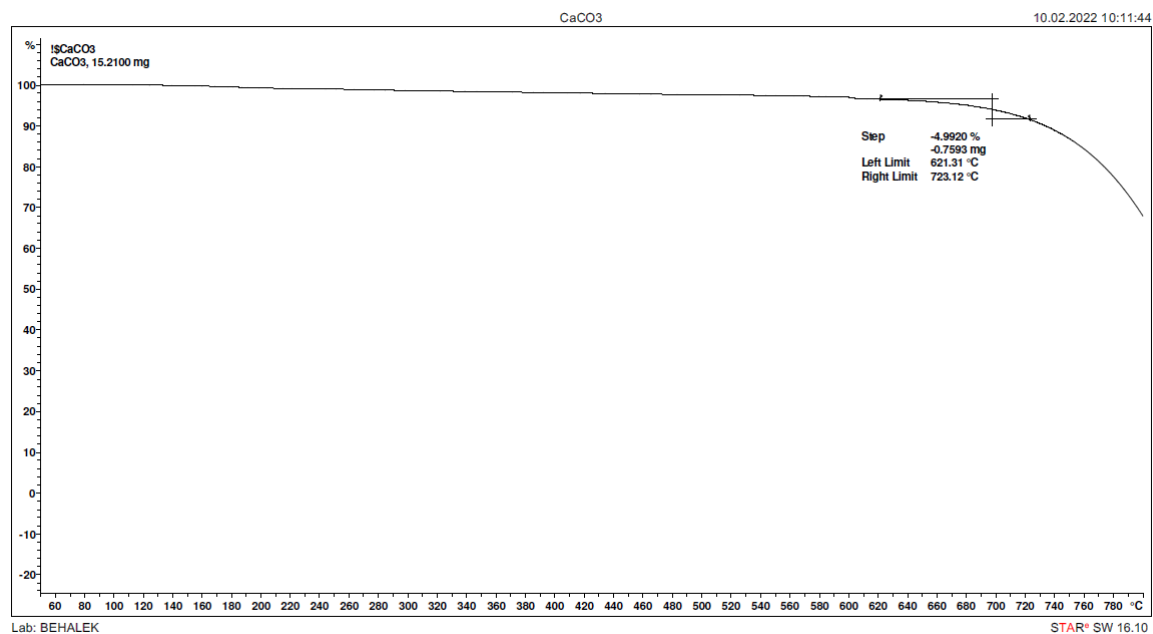

**Figure S2.** Thermogravimetric analysis (TGA) curve of precipitated CaCO<sub>3</sub> (Honeywell Fluka, Seelze, Germany).
